# Supplementary material for: Interface engineering of CeO2 nanoparticle/Bi2WO6 nanosheet nanohybrids with oxygen vacancies for oxygen evolution reactions under alkaline conditions
Source: Royal Society of Chemistry journal article supplement (doi:10.1039/d2ra08273j), 2023-01-01
Supplement: d2ra08273j1.pdf [file d2ra08273j1.pdf]

Supporting Information

**Interface engineering of CeO<sub>2</sub> nanoparticles/Bi<sub>2</sub>WO<sub>6</sub> nanosheets nano hybrid with oxygen vacancy for Oxygen Evolution Reaction in alkaline conditions**

Dukhyun Nam<sup>a</sup>, Geunhyeong Lee<sup>a</sup>, Jooheon Kim<sup>a,b,c \*</sup>

<sup>a</sup> School of Chemical Engineering & Materials Science, Chung-Ang University, 84 Heukseok-ro, Dongjak-gu, Seoul, Korea

<sup>b</sup> Department of Advanced Materials Engineering, Chung-Ang University, Anseong-si, Gyeonggi-do 17546, Republic of Korea

<sup>c</sup> Department of Intelligent Energy and Industry, Graduate School, Chung-Ang University, Seoul 06974, Republic of Korea

\*Corresponding author

Prof. Jooheon Kim: [jooheonkim@cau.ac.kr](mailto:jooheonkim@cau.ac.kr)

## Detail methods

### Characterization methods.

Images of the nanoparticles morphology were acquired by field emission scanning electron microscope (FE-SEM, SIGMA 300, Carl Zeiss, Korea). Then, images of the nanoparticles morphology and energy dispersive X-ray (EDX) mapping data were acquired by field emission transmission electron microscopy (FE-TEM, JEM-F200, JEOL, Korea). The amorphous phase of obtained catalysts was confirmed by X-ray diffraction (XRD, Bruker-AXS, country) using a Cu K $\alpha$  radiation source at 40 kV ( $\lambda = 0.154$  nm, scan rate = 1.2 $^\circ$ /min, step size = 0.02 $^\circ$  and diffraction range = 10 $^\circ \leq 2\theta \leq 80^\circ$ ). X-ray photoelectron spectroscopy (XPS, K-alpha, ThermoFisher Scientific, country) analysis was used to explore the electrochemical bond structure of the catalysts and to examine the effects of interaction between atoms.

### Electrochemical activity measurements

Electrochemical performance of all samples was evaluated using three-electrode configuration with a potentiometry (CH Instruments, CHI 600E, USA) and a rotating-disk electrode (RDE). Before measurements, the glassy carbon electrode (GCE, diameter: 3.0 mm) was polished using 1  $\mu\text{m}$  polishing diamond and 0.05  $\mu\text{m}$  polishing alumina on the polishing pad, and then rinsed with DI water. The catalytic ink was prepared by mixing synthesized catalysts (5.0 mg), DI water (700  $\mu\text{L}$ ), isopropanol (200  $\mu\text{L}$ ) and Nafion solution (100  $\mu\text{L}$ , 5 %, Alfa-Aesar). 8  $\mu\text{L}$  of catalytic ink were dropped onto the GCE surface and left to dry for 1 h under 50  $^\circ\text{C}$ . Electrochemical properties of the catalysts were investigated using platinum wire (counter electrode), a GCE (working electrode) and an Ag/AgCl electrode (reference electrode). All electrochemical measurements were conducted in 1 M alkaline solution (KOH) with N $_2$  gas purged for at least 30 minutes, maintaining N $_2$  saturation during the measurements. All electrochemical data were calibrated with respect to the reversible hydrogen electrode (RHE), following the previously reported conversion equation ( $E_{\text{RHE}} = E_{\text{Ag/AgCl}} + 0.0592 \text{ pH}$

+  $E_{\text{Ag/AgCl}}^0$  at 1 M KOH media, where,  $E_{\text{Ag/AgCl}}^0$  (in 1 M KCl) = +0.235 V, pH = 14 for 1 M KOH), and also corrected by iR-compensation, to remove the ohmic potential loss, according to equation (1):

$$E_c = E_m - I_m \times R_s \quad (1)$$

Where,  $E_c$ ,  $E_m$ ,  $I_m$  and  $R_s$  correspond to corrected voltage, measured voltage, measured current and electrolyte resistance, respectively. Electrochemical impedance spectroscopy (EIS) was recorded from 100 kHz to 0.1 Hz at 1.7 V (vs. RHE) with amplitude of 10 mV.

The overpotential was examined by LSV, using 1600 rpm at a 5 mV/s scan rate, and a voltage range of 0.2-1.0 V in Ag/AgCl. The Tafel slope was obtained from the LSV curve by applying equation (2):

$$\eta = a + b \times \log |J| \quad (2)$$

Where,  $b$ ,  $J$ , and  $\eta$  are the Tafel slope, current density and overpotential, respectively.

In order to evaluate the electrochemically active surface area (ECSA), cyclic voltammetry (CV) curve was obtained using a voltage range of 1.12 V to 1.22 V in RHE (no Faradaic process voltage range) with various scan rates, and the linear relationship between scan rates and current densities was estimated. As a result, we obtained the double-layer capacitance ( $C_{dl}$ ) using equation (3).

$$C_{dl} = a \times \frac{|ja - jc|}{2v} \quad (3)$$

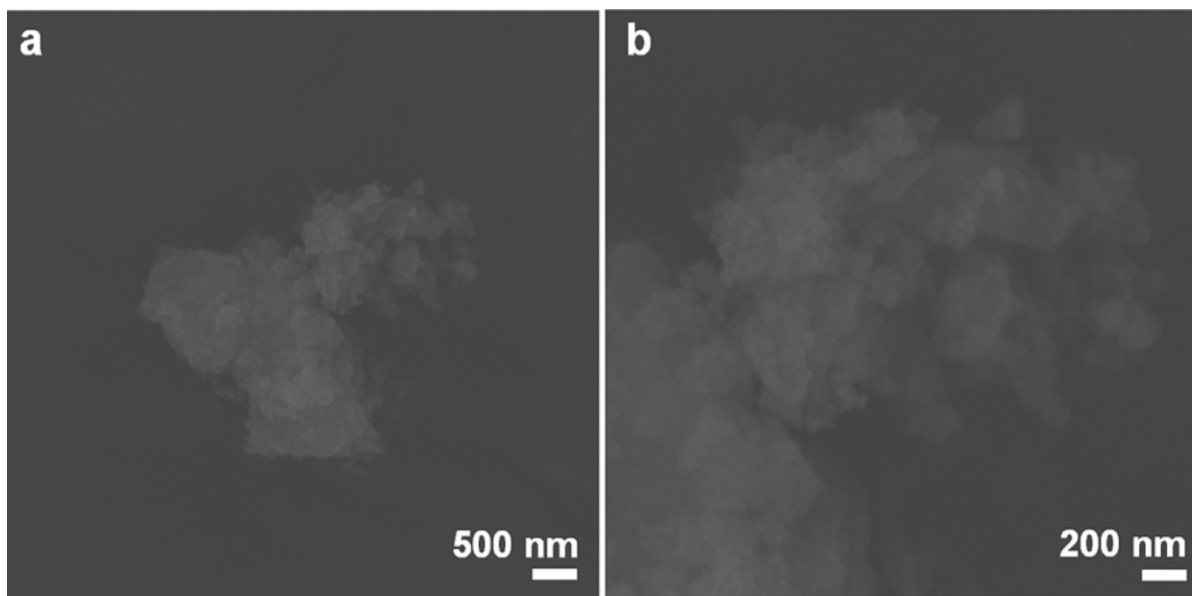

**Fig. S1.** FE-SEM images at (a) low magnification and (b) high magnification of CeO<sub>2</sub> nanoparticles.

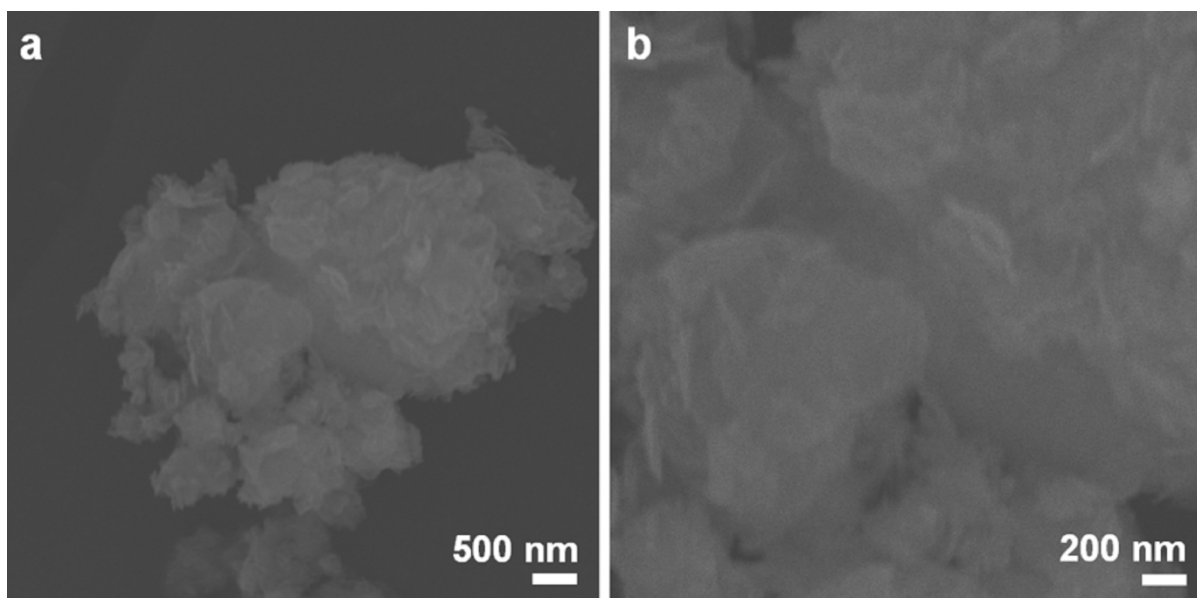

**Fig. S2.** FE-SEM images at (a) low magnification and (b) high magnification of  $\text{Bi}_2\text{WO}_6$  nanosheets.

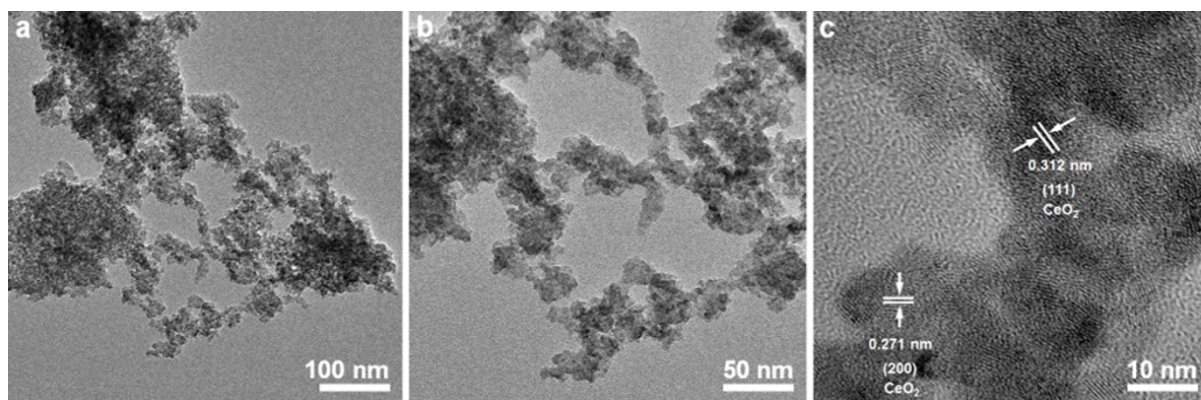

**Fig. S3.** FE-TEM images at (a) low magnification and (b) high magnification of CeO<sub>2</sub> nanoparticles. (c) HRTEM image of CeO<sub>2</sub> nanoparticles.

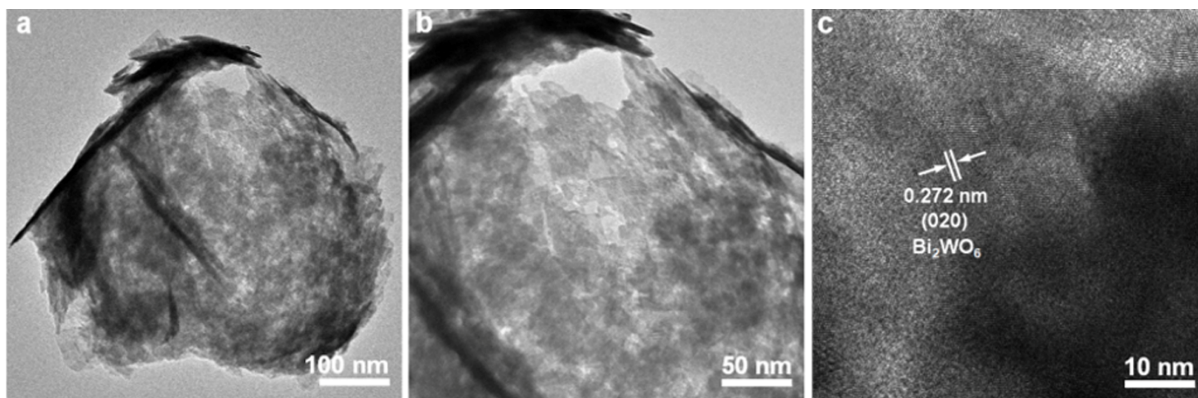

**Fig. S4.** FE-TEM images at (a) low magnification and (b) high magnification of Bi<sub>2</sub>WO<sub>6</sub> nanosheets. (c) HRTEM image of Bi<sub>2</sub>WO<sub>6</sub> nanosheets.

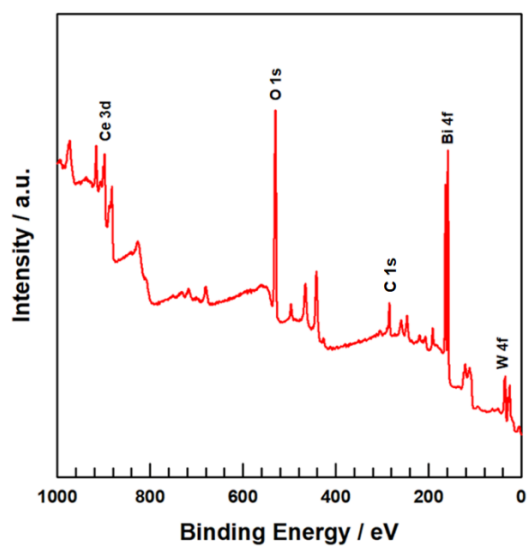

**Fig. S5.** XPS survey spectra for  $\text{CeO}_2/\text{Bi}_2\text{WO}_6$ .



|                                                   | Oxygen Vacancies |
|---------------------------------------------------|------------------|
| CeO <sub>2</sub> /Bi <sub>2</sub> WO <sub>6</sub> | 46.8 %           |
| CeO <sub>2</sub>                                  | 44.6 %           |
| Bi <sub>2</sub> WO <sub>6</sub>                   | 9.7 %            |

**Table S1.** the oxygen vacancies amounts of CeO<sub>2</sub>/Bi<sub>2</sub>WO<sub>6</sub>, CeO<sub>2</sub> and Bi<sub>2</sub>WO<sub>6</sub>.

|                                                      | OER E(@10mA cm <sup>-2</sup> )/V<br>(vs. RHE) | OER Tafel slope / mV<br>dec-1 | Reference |
|------------------------------------------------------|-----------------------------------------------|-------------------------------|-----------|
| Bi <sub>2</sub> WO <sub>6</sub> CNPs                 | 1.77                                          | -                             | [S1]      |
| CoO <sub>x</sub> /Bi <sub>2</sub> WO <sub>6</sub> -2 | 1.72                                          | 114                           | [S2]      |
| NiS/Bi <sub>2</sub> WO <sub>6</sub> -4               | 1.757                                         | 238                           | [S3]      |
| NiFeO <sub>x</sub> /Bi <sub>2</sub> WO <sub>6</sub>  | 1.73                                          | 125                           | [S4]      |
| CeO <sub>2</sub> /Bi <sub>2</sub> WO <sub>6</sub>    | 1.62                                          | 117                           | This work |

**Table S2.** The OER performance of CeO<sub>2</sub>/Bi<sub>2</sub>WO<sub>6</sub> in this work and some recently reported alkaline electrolyte.

|                  | $R_s (\Omega)$ | $R_{ct} (\Omega)$ |
|------------------|----------------|-------------------|
| $CeO_2/Bi_2WO_6$ | 11.93          | 1302.56           |
| $CeO_2$          | 13.29          | 1498.23           |
| $Bi_2WO_6$       | 13.94          | 4034.65           |

Table S3. Comparison of solution resistance ( $R_s$ ) and charge transfer resistance ( $R_{ct}$ ) for OER.

### Reference

[S1] Z.-P. Nie, D.-K. Ma, G.-Y. Fang, W. Chen, S.-M. Huang, Concave  $Bi_2WO_6$  nanoplates with oxygen vacancies achieving enhanced electrocatalytic oxygen evolution in near-neutral water, *J. Mater. Chem. A*, 4 (2016) 2438-2444.

[S2] J. Li, Z. Liang, Q. Song, X. Xu, Strong-coupled  $CoO_x$  nanoparticles/ $Bi_2WO_6$  nanosheets hybrid as electrocatalyst for water oxidation under alkaline conditions, *Mater. Res. Bull.* 113 (2019) 152-160.

[S3] J. Li, X. Xu, B. Zhang, W. Hou, S. Lv, Y. Shi, Controlled synthesis and fine-tuned interface of  $NiS$  nanoparticles/ $Bi_2WO_6$  nanosheets heterogeneous as electrocatalyst for oxygen evolution reaction, *Appl. Surf. Sci.*, 526 (2020) 146718.

[S4] J. Li, Z. Liang, Q. Song, X. Xu,  $NiFeO_x$  nanosheets tight-coupled with  $Bi_2WO_6$  nanosheets to improve the electrocatalyst for oxygen evolution reaction, *Appl. Surf. Sci.*, 478 (2019) 969-980.
